# Supplementary material for: The Association between Genetic Variants and Gene Expression in RAAS Genes Using Captive-Bred Vervet Monkeys (Chlorocebus aethiops)
Source: Hindawi journal article supplement (doi:10.1155/2023/6344652), 2023-02-17
Supplement: f1 [file 6344652.f1.zip]

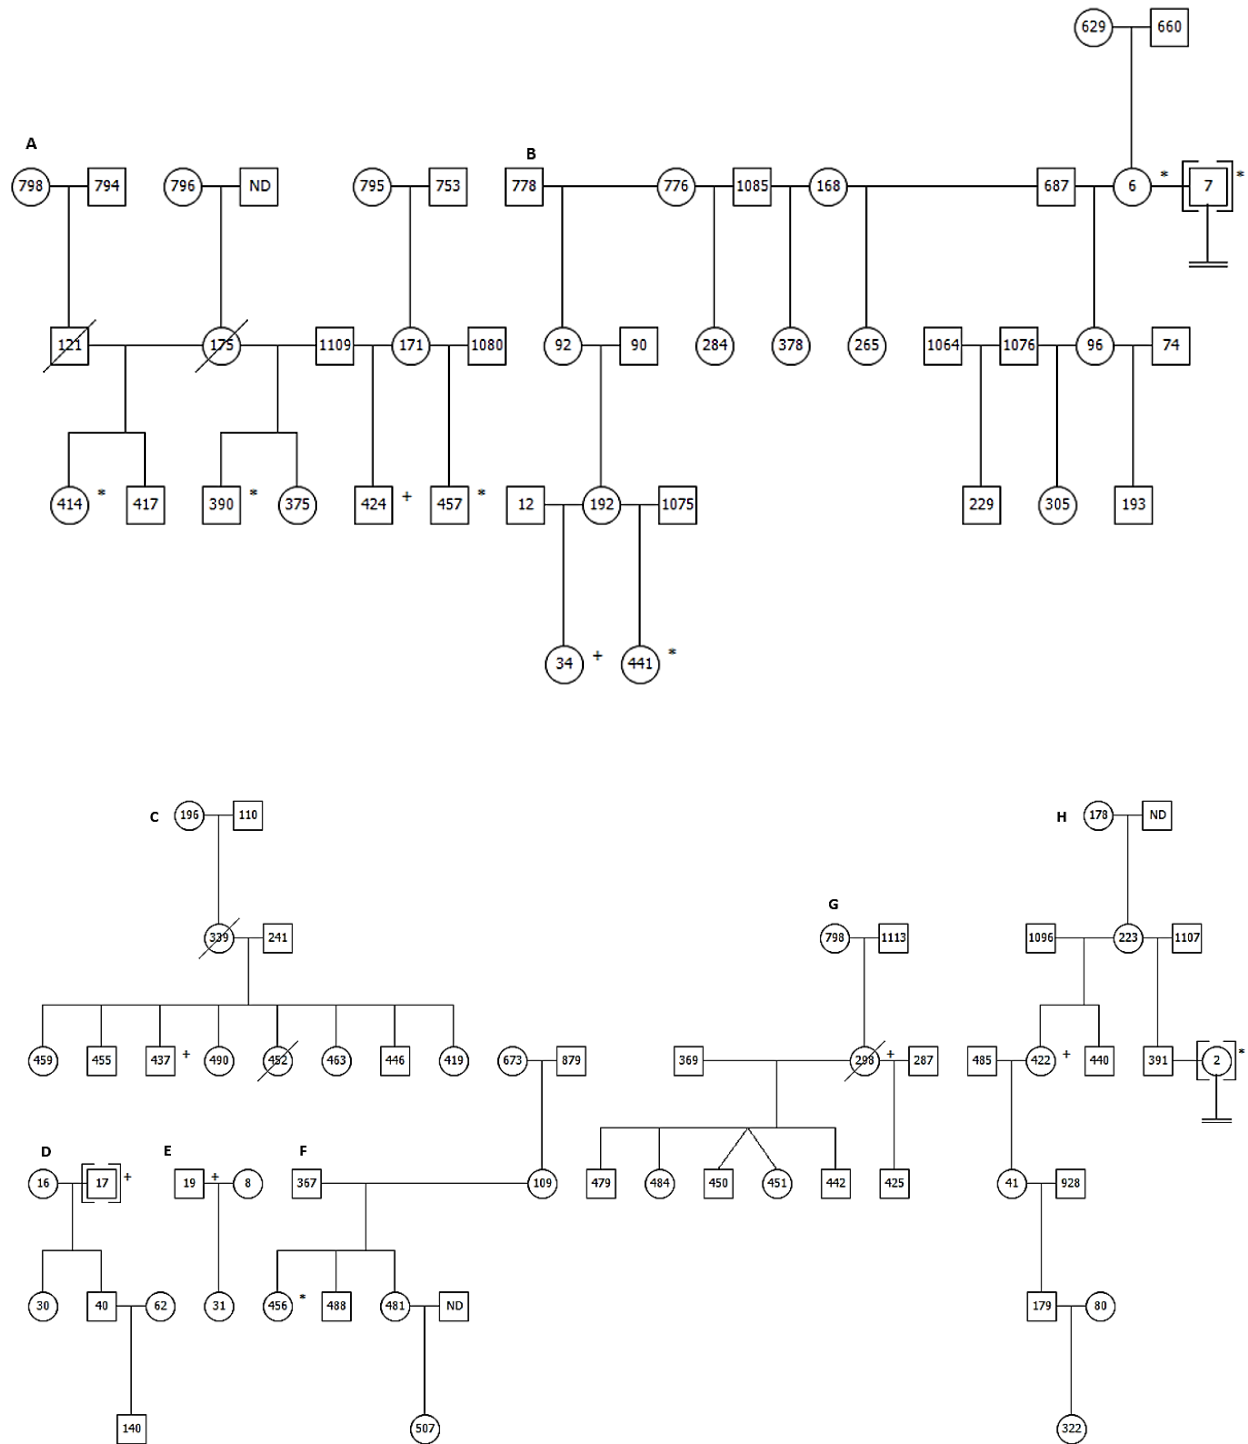

**Figure S1.** The pedigree diagram of captive-bred Vervet monkeys. ‘\*’ Indicates animals with normal blood pressure, and ‘+’ indicates hypertensive animals. The circles represent females, and the square represents males. [ ] denotes wild animals that were taken from the ModderFontein farm in Potchefstroom before being housed at PUDAC.
