# Supplementary material for: The Association between Genetic Variants and Gene Expression in RAAS Genes Using Captive-Bred Vervet Monkeys (Chlorocebus aethiops)
Source: Hindawi journal article supplement (doi:10.1155/2023/6344652), 2023-02-17
Supplement: f1 [file 6344652.f1.zip]

Archive with 2 entries (2 files):
- 6344652.f1/Figure S1.pdf
- 6344652.f1/Supporting Data_ Tables.docx
