# Supplementary material for: The Association between Genetic Variants and Gene Expression in RAAS Genes Using Captive-Bred Vervet Monkeys (Chlorocebus aethiops)
Source: Hindawi journal article supplement (doi:10.1155/2023/6344652), 2023-02-17
Supplement: f1 [file 6344652.f1.zip › 6344652.f1/Supporting Data_ Tables.docx]

**Supporting Materials**

d)a)

b)

c)

**Table S1** Clinical measurements of the captive-bred Vervet monkeys

| **Animals ID** | **Gender** | **Systolic BP (mmHg)** | **Diastolic BP (mmHg)** | **LDL- C (mmol/L)** | **Cholesterol (mmol/L)** | **Triglycerides (mmol/L)** | **HDL-C(mmol/L)** | **Cholesterol: HDL Ratio** |
| --- | --- | --- | --- | --- | --- | --- | --- | --- |
| **390** | M | 81 | 61.5 | 1.3 | 3.8 | 0.38 | 2.3 | 1.7 |
| **457** | M | 82.5 | 27.5 | 1.6 | 3.8 | 0.29 | 2.1 | 1.8 |
| **441** | F | 101.00 | 33.5 | 1.9 | 4.2 | 0.32 | 2 | 2.1 |
| **414** | F | 102 | 30.5 | 1.5 | 4.5 | 0.8 | 2.9 | 1.6 |
| **7** | M | 109.00 | 43 | 0.8 | 2.8 | 0.26 | 1.6 | 1.8 |
| **456** | F | 110.5 | 21.5 | 1.8 | 4.3 | 0.52 | 2.3 | 1.9 |
| **6** | F | 115.5 | 66 | 2.4 | 5.1 | 1.08 | 2.2 | 2.3 |
| **2** | F | 124.00 | 87 | 1.3 | 3.9 | 0.45 | 2.2 | 1.8 |
| **19** | M | 133.00 | 49.5 | 1.2 | 3.9 | 0.36 | 1.9 | 2.1 |
| **34** | F | 138.00 | 47 | 2.6 | 4.7 | 0.58 | 1.9 | 2.5 |
| **422** | F | 140 | 63 | 1.4 | 3.8 | 0.43 | 1.9 | 2 |
| **437** | M | 166.00 | 53.5 | 1 | 2.8 | 0.4 | 1.5 | 1.9 |
| **298** | F | 172.00 | 97 | 1.1 | 2.7 | 0.4 | 1.3 | 2.1 |
| **10** | M | 184 | 110 | 1.9 | 3.8 | 0.1 | 1.8 | 2.1 |
| **424** | M | 188.5 | 69.5 | 1.7 | 4.3 | 0.54 | 2.5 | 1.7 |
| **17** | M | 219.00 | 93 | 0.9 | 2.8 | 0.41 | 1.6 | 1.8 |

M, male; F, female; BP, blood pressure; LDC-C, Blood pressure, BP; low-density lipoproteins-cholesterol; HDL-C, high-density lipoproteins-cholesterol; HDL, high-density lipoproteins.

**Table S2** Green monkey (*Chlorocebus sabaeus*) reference sequence for selected genes

| **Gene** | **NCBI ID** | **Accession Number** | **Chromosome location** | **Number of exons** |
| --- | --- | --- | --- | --- |
| ***AGT*** | 103230737 | XM_007989767.1 | 25 | 5 |
| ***CYP3A5*** | 103246770 | XM_008018616.1 | 28 | 15 |
| ***GRK4*** | 103246447 | XM_008018047.1 | 27 | 17 |
| ***SLC4A5*** | 103220036 | XM_007970183.1 | 14 | 30 |

**Table S3** Designed PCR primers for *AGT, CYP3A5, GRK4*, and *SLC4A5* genes

| **Gene** | **Exon** | **Forward primer sequence** | **Reverse primer sequence** | **Size (bp)** | **Tm (°C)** |
| --- | --- | --- | --- | --- | --- |
| *AGT* | 2 | TCAGGGTATGCAGAAGCG | CAGAGGGGTCTGCCTTAC | 881 | TD 69 |
|  | 3 | ATGTCTTCAGTAGGTGGCGG | AGTTCGGCTCCCACATTCCA | 552 | 55 |
|  | 4 | GTCAGCGTTGGGTACAAGGA | CTCCCACCCTGTGAACACTC | 300 | 54 |
|  | 5 | GACACACCCTTGCCTACACT | TCTTACTGCTCACTCCACGC | 577 | 59 |
| *CYP3A5* | 1 | CCTCCTTCTCCAGCACATAAA | CTGTCCCTAAACCCTCCTAATC | 454 | 51 |
|  | 3 | AGCCCCAATTAGAGGTAGGGT | GGGATAGGCAGACACTGGAC | 841 | 61 |
|  | 4 | TGTCTCTTCCCTGTTTGGGC | GGTGGGTGCAAAGGTTATTTCAG | 579 | 61 |
|  | 5&6 | GATGGCTGGGTCTCCAAACT | CCCTGCTTTTGTCTGGTCACT | 797 | 61 |
|  | 8 | TAGAGACCTGCCCTTGCTCA | CTCATCTCCTTCCCCAATCTCC | 481 | 58 |
|  | 10 | ATCACCACGCTTCTGGCTTT | GCCCTTCATCTCCAGGGGTC | 997 | 59 |
|  | 12 | GGTGGAGGGGGATGGTTCTT | TCGCAGGCATCGTGAATTTT | 697 | 63 |
|  | 13 | TGGTGAGGGCTTTTACTATCCA | GCACAACACTCTACACAGGCA | 475 | 61 |
| *GRK4* | 2 | TACCCAAACCGCTCAAACAGA | TTCAGGCATAAGTAGGCACG | 231 | 60 |
|  | 3 | GCTTAGAACAGCATGTGGTGG | GGGGGTTGCTCAGTATGGAGAT | 215 | 56 |
|  | 5 | GAGAGTGGGACTAGCGTGGA | TGTCTCGGGGTTAGTCACAG | 309 | 58 |
|  | 6 | CCTTGCTCATGCTGGTTGTT | TGCCTAAACACAGGGAAGTGA | 324 | 56 |
|  | 7 | AAAGTATCACCACTGCCCCC | CAGGACTCACAACCTCTCGG | 372 | 66 |
|  | 10 | ACACTAAAAGCTGGCGAACC | TCCTGGGTCATTGCTGGAAC | 400 | 60 |
|  | 11 | GGAGACCCACTGACCTGGAA | AACTGCTTGTAGGAGCCATTG | 313 | 60 |
| *SLC4A5* | 4 | TGCCAATCAGAGCAGAGCTAA | CTGTCCTTCTCAGTTGTGTTGA | 536 | 65 |
|  | 5 | CACACCCGGCTATATGTCCT | GAGTCAGGAAAAGGGACCTGC | 338 | 58 |
|  | 6 | ACGGGGAATTGGGAGTTCTG | GAGCCATGTGGAGCATTACCT | 560 | 60 |
|  | 8 | ATAGCTTGACCCCACAGGAC | ATGGCAAGAGGTGTCTCTGAC | 550 | 60 |
|  | 9 | CTCCTGGGGCAGTTTCGTAT | CCTCTCCAGGCGGTTTGATG | 902 | 50 |
|  | 10 | TTCACTACACCAGCAAGGCT | AGATCCTGGGCTTTGTCTCC | 250 | 56 |
|  | 16 | TCCATCCACCCCAGTCAAGT | CCTGGCTGGTAGATGAAACC | 404 | 56 |
|  | 17 | GCACGTCCGCTGTTTTGTAG | AAGATGGCTTTGGCACCTCC | 516 | 56 |
|  | 18 | ACACTGGACCCCCATGAGAT | CCAGCAGTGGGATTAGAGAGC | 556 | 60 |
|  | 19 | GCAAAGTGAGGAAGGTGGAGA | TGACGTGAGGTTGGAGTTGA | 337 | 60 |
|  | 24 | GCCTTGGACACAAACTTCAGG | AGGCATCCACTCTGCTTTCTC | 231 | 56 |
|  | 25 | CTGCTAACTCTCGGTTCCCC | ATTGGGGGTCTTGGTGACAT | 281 | 58 |
|  | 27 | TGTCCCTCTTGGTCACTGGTA | CTAGCCCTGGCAAAAGTGGAG | 469 | 58 |
|  | 28 | GCCAAGAACTATTACAGGGTTGG | TCCCCCTGAGTTACAGATGAA | 894 | 60 |

TD, touch down; Tm, melting temperature; °C, degree Celsius

**Table S4** qRT-PCR primer assays (*Homo sapiens)* for selected genes

| **Gene** | **Ref Sequence Number** | **Assay ID** | **Exon location** |
| --- | --- | --- | --- |
| ***AGT*** | NM_000029 | Hs.PT.56a.40899792 | 1-2 |
| ***CYP3A5*** | NR_033811 | Hs.PT.58.2827789 | 6-7 |
| ***GRK4*** | NM_182982 | Hs.PT.58.26171351 | 12-13 |
| ***SLC4A5*** | NM_133478 | Hs.PT.58.565664 | 20-21 |

**Table S5:** Genetic variation analysis for Vervet monkeys

| **Gene** | **Exon** | **AA change** | **Male** | **Female** |
| --- | --- | --- | --- | --- |
| ***AGT*** | Exon 2 | P65P | M7 | M34, M441 |
|  |  | T76T | M7 | M34, M441 |
|  |  | V89A | M10, M17, M437, 457 | M2, M414, M298, |
|  | Exon 3 | T318T | M7, M10, M17, M390, M424, M437, M457 | M2, M6, M298, M414, M441, M456 |
|  | Exon 5 | R477R | M390, M414, M424, M437 | M6, M298, M441, M456 |
| ***CYP3A5*** | Exon 5 | E125Q | All animals | All animals |
|  | Exon 10 | L295L | All animals | All animals |
|  |  | V296V | All animals | All animals |
| ***GRK4*** | Exon 3 | L102R | All animals | All animals |
|  | Exon 5 | A178V | All animals | All animals |
|  | Exon 6 | Q196R | All animals | All animals |
|  |  | Q196R | All animals | All animals |
|  | Exon 11 | S414N | All animals | All animals |
| ***SLC4A5*** | Exon 6 | S61S | All animals | All animals |
|  | Exon 8 | T180T | M10, M19, M424, M457 | M456 |
|  | Exon 9 | R235R | M19, M457 | M2 |
|  | Exon 17 | S580S | M390 | M34, M441 |
|  | Exon 18 | G648G | M7, M10 | M2, M6, M34, M422, M441 |
|  |  | L649F | All animals | All animals |
|  | Exon 24 | T939T | All animals | All animals |
|  | Exon 25 | V964V | M19 | M2 |
